# Supplementary material for: Development of a nanometre scale X-ray speckle-based CT technique through the 3-D histological assessment of an acute respiratory distress syndrome model
Source: Springer Nature journal article supplement (doi:10.1038/s41598-024-72660-0), 2024-10-10
Supplement: 41598_2024_72660_MOESM4_ESM.pdf [file 41598_2024_72660_MOESM4_ESM.pdf]

# RBCs

Cornelio Salinas

26/10/2021

The aims of the analysis is to investigate which Pixel Values, on average, differ between the Cell Types (Leukocytes, RBCs, T1, T2).

```
## CellType PixelValue nPixelValue
## 1 Leukocyte 4.57e-07 457
## 2 Leukocyte 4.80e-07 480
## 3 Leukocyte 5.16e-07 516
## 4 Leukocyte 5.06e-07 506
## 5 Leukocyte 4.96e-07 496
## 6 Leukocyte 5.79e-07 579
```

Pixel Value /  $10^{-9}$

|                    | Leukocyte<br>(N=15) | RBCs<br>(N=15) | Type1pneumocytes<br>(N=15) | Type2pneumocytes<br>(N=15) | Overall<br>(N=60) |
|--------------------|---------------------|----------------|----------------------------|----------------------------|-------------------|
| <b>nPixelValue</b> |                     |                |                            |                            |                   |
| Mean (SD)          | 545 (46.5)          | 572 (27.7)     | 550 (30.6)                 | 554 (50.3)                 | 555 (40.3)        |
| Median [Min, Max]  | 544 [457, 613]      | 585 [509, 600] | 568 [497, 584]             | 547 [479, 647]             | 568 [457, 647]    |

Boxplot of PixelValue by CellType  
(mean symbol superimposed)

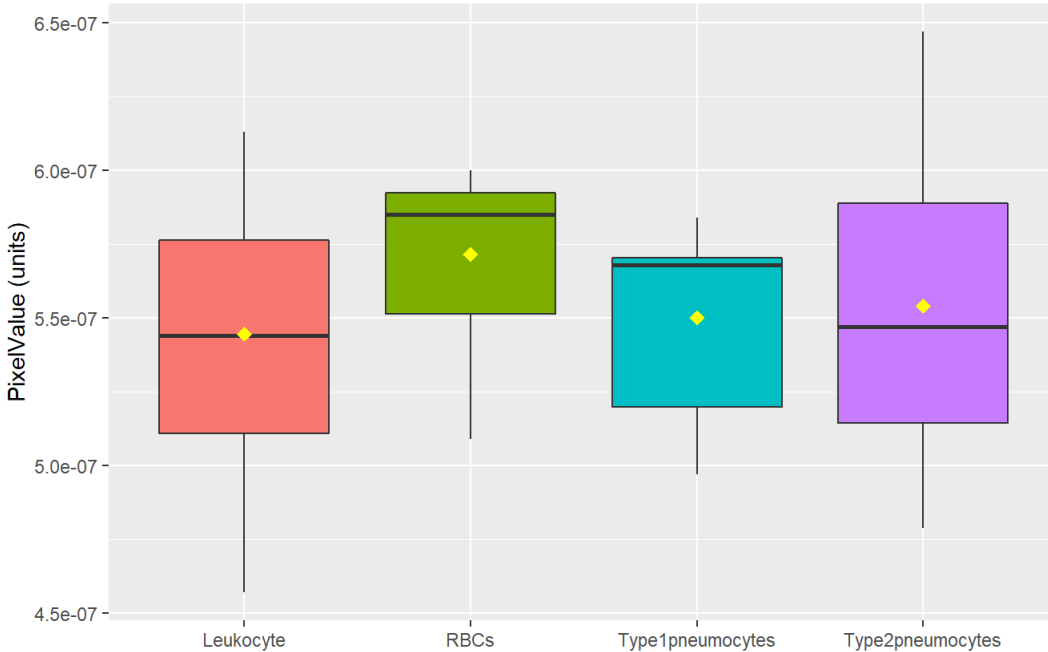

## SUBJECTIVE IMPRESSIONS - NULL AND ALTERNATIVE HYPOTHESIS

Null Hypothesis  $H_0$  = The population PixelValue is equal in the population between RBCs and Leukocytes/t1pneumocytes/t2pneumocytes.

Alternative Hypothesis  $H_1$  = The population PixelValue is NOT equal in the population between RBCs and Leukocytes/t1pneumocytes/t2pneumocytes.

```
##
## Pairwise comparisons using t tests with pooled SD
##
## data: lungtissue.df$PixelValue and lungtissue.df$CellType
##
##      Leukocyte RBCs Type1pneumocytes
## RBCs      0.07  -  -
## Type1pneumocytes 0.71  0.15 -
## Type2pneumocytes 0.52  0.24 0.79
##
## P value adjustment method: none
```

To determine which groups have different population PixelValues, a pairwise comparison using the pairwise t test was done (no correction method). No cell type comparison has a P value less than 0.05. One can then conclude that there is no significant difference, on average, of the PixelValue between each of the pairs.

| ##    | CellType  | PixelValue | nPixelValue |
|-------|-----------|------------|-------------|
| ## 1  | Leukocyte | 4.57e-07   | 457         |
| ## 2  | Leukocyte | 4.80e-07   | 480         |
| ## 3  | Leukocyte | 5.16e-07   | 516         |
| ## 4  | Leukocyte | 5.06e-07   | 506         |
| ## 5  | Leukocyte | 4.96e-07   | 496         |
| ## 6  | Leukocyte | 5.79e-07   | 579         |
| ## 7  | Leukocyte | 5.36e-07   | 536         |
| ## 8  | Leukocyte | 5.44e-07   | 544         |
| ## 9  | Leukocyte | 6.05e-07   | 605         |
| ## 10 | Leukocyte | 5.89e-07   | 589         |
| ## 11 | Leukocyte | 6.13e-07   | 613         |
| ## 12 | Leukocyte | 5.64e-07   | 564         |
| ## 13 | Leukocyte | 5.74e-07   | 574         |
| ## 14 | Leukocyte | 5.74e-07   | 574         |
| ## 15 | Leukocyte | 5.38e-07   | 538         |
| ## 16 | RBCs      | 5.37e-07   | 537         |
| ## 17 | RBCs      | 5.38e-07   | 538         |
| ## 18 | RBCs      | 5.58e-07   | 558         |
| ## 19 | RBCs      | 5.09e-07   | 509         |
| ## 20 | RBCs      | 5.45e-07   | 545         |
| ## 21 | RBCs      | 5.89e-07   | 589         |
| ## 22 | RBCs      | 5.94e-07   | 594         |
| ## 23 | RBCs      | 5.85e-07   | 585         |
| ## 24 | RBCs      | 5.92e-07   | 592         |
| ## 25 | RBCs      | 5.97e-07   | 597         |
| ## 26 | RBCs      | 5.89e-07   | 589         |
| ## 27 | RBCs      | 5.77e-07   | 577         |
| ## 28 | RBCs      | 5.93e-07   | 593         |
| ## 29 | RBCs      | 5.72e-07   | 572         |
| ## 30 | RBCs      | 6.00e-07   | 600         |

| ##    | CellType         | PixelValue | nPixelValue |
|-------|------------------|------------|-------------|
| ## 1  | RBCs             | 5.37e-07   | 537         |
| ## 2  | RBCs             | 5.38e-07   | 538         |
| ## 3  | RBCs             | 5.58e-07   | 558         |
| ## 4  | RBCs             | 5.09e-07   | 509         |
| ## 5  | RBCs             | 5.45e-07   | 545         |
| ## 6  | RBCs             | 5.89e-07   | 589         |
| ## 7  | RBCs             | 5.94e-07   | 594         |
| ## 8  | RBCs             | 5.85e-07   | 585         |
| ## 9  | RBCs             | 5.92e-07   | 592         |
| ## 10 | RBCs             | 5.97e-07   | 597         |
| ## 11 | RBCs             | 5.89e-07   | 589         |
| ## 12 | RBCs             | 5.77e-07   | 577         |
| ## 13 | RBCs             | 5.93e-07   | 593         |
| ## 14 | RBCs             | 5.72e-07   | 572         |
| ## 15 | RBCs             | 6.00e-07   | 600         |
| ## 16 | Type1pneumocytes | 4.97e-07   | 497         |
| ## 17 | Type1pneumocytes | 5.12e-07   | 512         |
| ## 18 | Type1pneumocytes | 5.01e-07   | 501         |
| ## 19 | Type1pneumocytes | 5.16e-07   | 516         |
| ## 20 | Type1pneumocytes | 5.24e-07   | 524         |
| ## 21 | Type1pneumocytes | 5.76e-07   | 576         |
| ## 22 | Type1pneumocytes | 5.55e-07   | 555         |
| ## 23 | Type1pneumocytes | 5.70e-07   | 570         |
| ## 24 | Type1pneumocytes | 5.84e-07   | 584         |
| ## 25 | Type1pneumocytes | 5.71e-07   | 571         |
| ## 26 | Type1pneumocytes | 5.67e-07   | 567         |
| ## 27 | Type1pneumocytes | 5.68e-07   | 568         |
| ## 28 | Type1pneumocytes | 5.69e-07   | 569         |
| ## 29 | Type1pneumocytes | 5.74e-07   | 574         |
| ## 30 | Type1pneumocytes | 5.69e-07   | 569         |

```
##      CellType PixelValue nPixelValue
## 1      RBCs 5.37e-07 537
## 2      RBCs 5.38e-07 538
## 3      RBCs 5.58e-07 558
## 4      RBCs 5.09e-07 509
## 5      RBCs 5.45e-07 545
## 6      RBCs 5.89e-07 589
## 7      RBCs 5.94e-07 594
## 8      RBCs 5.85e-07 585
## 9      RBCs 5.92e-07 592
## 10     RBCs 5.97e-07 597
## 11     RBCs 5.89e-07 589
## 12     RBCs 5.77e-07 577
## 13     RBCs 5.93e-07 593
## 14     RBCs 5.72e-07 572
## 15     RBCs 6.00e-07 600
## 16 Type2pneumocytes 5.13e-07 513
## 17 Type2pneumocytes 4.92e-07 492
## 18 Type2pneumocytes 4.79e-07 479
## 19 Type2pneumocytes 5.16e-07 516
## 20 Type2pneumocytes 4.95e-07 495
## 21 Type2pneumocytes 5.46e-07 546
## 22 Type2pneumocytes 5.97e-07 597
## 23 Type2pneumocytes 5.45e-07 545
## 24 Type2pneumocytes 6.47e-07 647
## 25 Type2pneumocytes 6.31e-07 631
## 26 Type2pneumocytes 5.57e-07 557
## 27 Type2pneumocytes 5.91e-07 591
## 28 Type2pneumocytes 5.87e-07 587
## 29 Type2pneumocytes 5.70e-07 570
## 30 Type2pneumocytes 5.47e-07 547
```

```
##      CellType PixelValue nPixelValue
## 1 Type1pneumocytes 4.97e-07 497
## 2 Type1pneumocytes 5.12e-07 512
## 3 Type1pneumocytes 5.01e-07 501
## 4 Type1pneumocytes 5.16e-07 516
## 5 Type1pneumocytes 5.24e-07 524
## 6 Type1pneumocytes 5.76e-07 576
## 7 Type1pneumocytes 5.55e-07 555
## 8 Type1pneumocytes 5.70e-07 570
## 9 Type1pneumocytes 5.84e-07 584
## 10 Type1pneumocytes 5.71e-07 571
## 11 Type1pneumocytes 5.67e-07 567
## 12 Type1pneumocytes 5.68e-07 568
## 13 Type1pneumocytes 5.69e-07 569
## 14 Type1pneumocytes 5.74e-07 574
## 15 Type1pneumocytes 5.69e-07 569
## 16 Type2pneumocytes 5.13e-07 513
## 17 Type2pneumocytes 4.92e-07 492
## 18 Type2pneumocytes 4.79e-07 479
## 19 Type2pneumocytes 5.16e-07 516
## 20 Type2pneumocytes 4.95e-07 495
## 21 Type2pneumocytes 5.46e-07 546
## 22 Type2pneumocytes 5.97e-07 597
## 23 Type2pneumocytes 5.45e-07 545
## 24 Type2pneumocytes 6.47e-07 647
## 25 Type2pneumocytes 6.31e-07 631
## 26 Type2pneumocytes 5.57e-07 557
## 27 Type2pneumocytes 5.91e-07 591
## 28 Type2pneumocytes 5.87e-07 587
## 29 Type2pneumocytes 5.70e-07 570
## 30 Type2pneumocytes 5.47e-07 547
```

T1 vs T2

```
## # A tibble: 1 x 7
##   statistic t_df p_value alternative estimate lower_ci upper_ci
##   <dbl> <dbl> <dbl> <chr> <dbl> <dbl> <dbl>
## 1 -0.263 23.1 0.795 two.sided -4.00e-9 -0.0000000354 0.0000000274
```

vs LEUKOCYTES

```
## # A tibble: 1 x 7
##   statistic t_df p_value alternative estimate lower_ci upper_ci
##   <dbl> <dbl> <dbl> <chr>         <dbl> <dbl> <dbl>
## 1     1.93  22.9  0.0664 two.sided  0.0000000269 -1.98e-9 0.0000000558
```

A two-tailed student's t-test was conducted with a 95% confidence interval. The p-value (0.066) is greater than 0.05 and the null hypothesis is not rejected. Furthermore, there is a 95% confidence that the difference between the two population means is between  $-1.98 \times 10^{-8}$  and  $5.58 \times 10^{-8}$ . There is no evidence of a difference between the RBCs and leukocytes. The average difference between the two cell types is not statistically significant.

RBCs vs T1

```
## # A tibble: 1 x 7
##   statistic t_df p_value alternative estimate lower_ci upper_ci
##   <dbl> <dbl> <dbl> <chr>         <dbl> <dbl> <dbl>
## 1     2.01  27.7  0.0539 two.sided  0.0000000215 -3.83e-10 0.0000000433
```

The p-value (0.054) is greater than 0.05 and the null hypothesis is not rejected. Furthermore, there is a 95% confidence that the difference between the two population means is between  $-3.83 \times 10^{-10}$  and  $4.33 \times 10^{-8}$ . Since the range is not exclusive to zero, there is no evidence, on average, of a difference between the RBCs and type1 pneumocytes. The average difference between the two cell types is not statistically significant.

RBCs vs T2

```
## # A tibble: 1 x 7
##   statistic t_df p_value alternative estimate lower_ci upper_ci
##   <dbl> <dbl> <dbl> <chr>         <dbl> <dbl> <dbl>
## 1     1.18  21.8  0.252 two.sided  0.0000000175 -0.0000000133 0.0000000482
```

The p-value (0.25) is greater than 0.05 and the null hypothesis is not rejected. Furthermore, there is a 95% confidence that the difference between the two population means is between  $-1.33 \times 10^{-8}$  and  $4.82 \times 10^{-8}$ . Since the range is not exclusive to zero, there is no evidence, on average, of a difference between the RBCs and type2 pneumocytes. The average difference between the two cell types is not statistically significant.

### CONCLUSION

From the box plot, there is no strong evidence of outliers or skewness to reject the normality assumption. This, paired with the sufficient sample size, allows us to make a reasonable assumption of normality. Given that the samples are also independent, the parametric student's t-test was chosen for hypothesis testing. Using a pairwise t-test, it was noted that the RBCs had no significant differences compared to the other cell types. This was further confirmed by conducting individual student t-tests.
